# Supplementary material
Source: Research Square preprint supplement (doi:10.21203/rs.3.rs-8999924/v1)
Supplement: Supplementary file 1 [file 5733fafef27c0b578d060161.docx]

**Appendix A**

*1. In the context of 19th-century musical nationalism, which of the following countries was not associated with the Nationalist School?*

A. United States

B. Russia

C. Finland

D. Norway

*2. Nationalist composers often drew inspiration from folk traditions and national identity. Which of the following composers was not considered part of the Nationalist movement?*

A. Bedřich Smetana

B. Johannes Brahms

C. Jean Sibelius

D. Edvard Grieg

*3. The Russian “Mighty Handful” (or “The Five”) were key figures in the development of Russian musical nationalism. Which of the following was one of their members?*

A. César Cui

B. Sergei Rachmaninoff

C. Franz Liszt

D. Franz Schubert

*4. Known as the “Father of Russian Music,” this composer paved the way for the Russian Nationalist School and inspired later composers such as Mussorgsky and Rimsky-Korsakov. Who was he?*

A. Modest Mussorgsky

B. Nikolai Rimsky-Korsakov

C. Pyotr Ilyich Tchaikovsky

D. Mikhail Glinka

*5. Which of the following works is not typically identified as a representative composition of the Russian Nationalist School?*

A. A Life for the Tsar (Ivan Susanin) by Mikhail Glinka

B. War and Peace by Sergei Prokofiev

C. In the Steppes of Central Asia by Alexander Borodin

D. The Bartered Bride by Bedřich Smetana

*6. Considered the first true Russian national opera, which of the following works established the foundation for later developments in Russian operatic tradition?*

A. Prince Igor by Alexander Borodin

B. A Life for the Tsar (Ivan Susanin) by Mikhail Glinka

C. Scheherazade by Nikolai Rimsky-Korsakov

D. War and Peace by Sergei Prokofiev

*7. Which of the following operas is based on a mythological subject?*

A. Ruslan and Lyudmila by Mikhail Glinka

B. In the Steppes of Central Asia by Alexander Borodin

C. Prince Igor by Alexander Borodin

D. Pictures at an Exhibition by Modest Mussorgsky

*8. The famous orchestral interlude Flight of the Bumblebee is derived from which of the following larger works?*

A. Kamarinskaya Fantasy by Mikhail Glinka

B. The Tale of Tsar Saltan by Nikolai Rimsky-Korsakov

C. Eugene Onegin by Pyotr Ilyich Tchaikovsky

D. Scheherazade by Nikolai Rimsky-Korsakov

*9. Modest Mussorgsky was one of the most original voices of Russian musical nationalism. Which of the following works was not composed by him?*

A. Pictures at an Exhibition

B. Night on Bald Mountain

C. Boris Godunov

D. A Life for the Tsar (Ivan Susanin)

*10. Mikhail Glinka is often credited with laying the foundation for Russian national music. Which of the following works was not composed by him?*

A. A Life for the Tsar (Ivan Susanin)

B. Ruslan and Lyudmila

C. The Queen of Spades

D. Kamarinskaya Fantasy

**Appendix B**

**Multiple-choice questions**

*1. Which of the following composers was not a representative of the Russian Nationalist School?*

A. Charles Gounod

B. Sergei Rachmaninoff

C. Nikolai Rimsky-Korsakov

D. Mikhail Glinka

*2. Which of the following musicians is regarded as the “Father of the Russian Nationalist School”?*

A. Modest Mussorgsky

B. Nikolai Rimsky-Korsakov

C. Pyotr Ilyich Tchaikovsky

D. Mikhail Glinka

*3. Which of the following operas is based on Russian patriotic and historical themes?*

A. Ruslan and Lyudmila

B. A Life for the Tsar (Ivan Susanin)

C. Scheherazade

D. In the Steppes of Central Asia

*4. Which of the following works reflects the close relationship between music and visual arts?*

A. Pictures at an Exhibition

B. War and Peace

C. In the Steppes of Central Asia

D. The Bartered Bride

*5. Which of the following is not a characteristic of the 19th-century Russian Nationalist School?*

A. Skilled at selecting patriotic and historical struggle themes

B. Skilled at employing ballet scenes

C. Skilled at using choral music to express patriotic sentiments

D. Skilled at integrating native folk elements with advanced Western compositional techniques

**Listening-based questions**

**1. The musical theme you hear (“Dance of the Chicks”) is from which of the following works?**

A*.* A Life for the Tsar (Ivan Susanin)

B*.* In the Steppes of Central Asia

C*.* Night on Bald Mountain

D*.* Pictures at an Exhibition

**2. The two contrasting themes you hear are from which of the following works?**
A. Fantasy on Kamarinskaya

B*.* Eugene Onegin

C*.* 1812 Overture

D*.* Boris Godunov

**3. The musical theme you hear is from which aria in the opera A** Life for the Tsar (Ivan Susanin)**?**
A. Ode to Joy

B. Glory to the Tsar

C. Arise, O Dawn

D. My Homeland

**Open-ended questions**

1. Discuss the compositional characteristics of the 19th-century Russian nationalist composers and their implications for contemporary music creation in China.

2. The Russian nationalist composers were skilled at using real patriotic historical events as the subject matter for their operas. Share your understanding of this.

3. Discuss the significance of Mussorgsky’s piano suite Pictures at an Exhibition for interdisciplinary integration in middle school music classes.

4. Share your understanding of Borodin’s symphonic poem In the Steppes of Central Asia.

5. Were there any teaching activities or methods in this lesson that you found particularly engaging?
